# Supplementary material for: Chromosome 3 Anomalies Investigated by Genome Wide SNP Analysis of Benign, Low Malignant Potential and Low Grade Ovarian Serous Tumours
Source: PLoS One. 2011 Dec 6;6(12):e28250. doi: 10.1371/journal.pone.0028250 (PMC3232202; doi:10.1371/journal.pone.0028250)
Supplement: Table S1 — Clinical data of ovarian tumour samples. (XLS) [file pone.0028250.s001.xls]

## Sheet: Sheet1
Supplementary Table 1. Clinical data of ovarian tumour samples.
Sample			Initial Pathology	Pathology Review	Age	Stage	Histopathology	Benign LOH	SNP Analysis	Status at last contact	Additional Medical Notes
BOV-145	T		Benign		63	-	Adenofibroma	+
BOV-146	DT		Benign		77	-	Adenofibroma	+
BOV-153	DT		Benign		46	-	Serous cystadenoma	+
BOV-392	DT	GT	Benign		57	-	Serous cystadenoma	DT only	+		Later diagnosis: Epidermal carcinoma of the vulva, in situ; 11 months later
BOV-682	T		Benign		76	-	Serous cystadenoma	+
BOV-846	DT	GT	Benign		67	-	Serous cystadenoma	GT only	+		Family history of digestive tract cancers and endometriosis of the uterus
BOV-876	T		Benign		75	-	Simple ovarian cyst	+
BOV-985	DT		Benign		37	-	Serous cystadenoma	+
BOV-1045	DT		Benign		52	-	Serous cyst	+
BOV-1059	GT		Benign		41	-	Adenofibroma	+
BOV-1074	T		Benign		54	-	Serous cyst	+
BOV-1084	GT		Benign		71	-	Fibroma	+
BOV-1112(B)	T		Benign		69	-	Serous cystadenofibroma	+
BOV-1172	DT	GT	Benign		66	-	Serous cystadenoma	+	+	Deceased	Previous diagnosis: Breast cancer; 3 years earlier, chemo treated
BOV-1207	DT		Benign		51	-	Serous	+	+	Needs additional radiotherapy	Previous diagnosis: Chronic depression. Later diagnosis: Ductal carcinoma of the breast; 9 years later
BOV-1237	T		Benign		69	-	Serous cyst	+
BOV-1259	DT		Benign		49	-	Mixed cystadenoma	+
BOV-1296	DT		Benign		71	-	Serous cystadenoma	+	+	No evidence of disease
BOV-1298	T		Benign		58	-	Serous cystadenoma	+
BOV-1305	GT		Benign		39	-	Serous cystadenoma	+
BOV-1308	T		Benign		47	-	Serous cyst	+
BOV-1325	GT		Benign		59	-	Serous cystadenoma	+
BOV-1329	GT		Benign		26	-	Serous cyst	+	+	No evidence of disease
BOV-1332	DT		Benign		67	-	Serous cyst	+	+	No evidence of disease
BOV-1359	DT		Benign		76	-	Serous cystadenoma	+
BOV-1515	T		Benign		42	-	Serous cyst	+
BOV-1553	DT		Benign		60	-	Serous cystadenoma	+
BOV-1588	DT	GT	Benign		56	-	Adenofibroma		+	Cancer of the upper lip	Previous diagnosis: Schizophrenic. Affectif, Hypertension 1984, 1987-02-04 breast reduction. Later diagnosis: Infiltrant basal carcinoma of the upper lip; 4 years later
BOV-1669	DT		Benign		64	-	Adenofibroma	+
BOV-1695	GT		Benign		41	-	Serous cyst	+
BOV-1696	GT		Benign		65	-	Mixed cystadenoma	+
BOV-1761	GT		Benign		63	-	Serous cystadenoma	+	+
BOV-1765(A)	DT		Benign		69	-	Serous cystadenoma	+
BOV-1903	DT		Benign		32	-	Serous cyst	+
BOV-1963	DT		Benign		66	-	Serous cyst	+
BOV-2023	DT		Benign		70	-	Serous cyst	+	+	No evidence of disease	Family history: Father with prostate cancer
BOV-2073	GT		Benign		33	-	Serous cyst	+
BOV-2077	T		Benign		66	-	Serous cystadenoma	+
BOV-2086	T		Benign		51	-	Serous cyst	+
BOV-2167	DT		Benign		49	-	Serous cystadenoma	+
BOV-2240	DT		Benign		50	-	Serous cystadenoma	+
BOV-2314	DT	GT	Benign		64	-	Serous cystadenoma	+	+	No evidence of disease	Hernia and intestinal fistula
BOV-2328	DT		Benign		52	-	Serous cystadenoma	+	+
BOV-2331	GT		Benign		57	-		+	+	No evidence of disease
BOV-2418	GT		Benign		71	-	Serous cystadenoma	+	+		At last contact, was being investigated for digestive recurrance
BOV-2436	DT		Benign		45	-	Serous cystadenoma	+
BOV-2506	DT		Benign		67	-	Serous cystadenoma	+	+
BOV-2564	GT		Benign		53	-	Serous cystadenoma	+	+
BOV-2567	DT		Benign		49	-	Serous cystadenoma	+
BOV-2889	DT	GT	Benign		65	-	Serous cystadenoma		+
BOV-3057	DT	GT	Benign		52	-	Serous cystadenoma		+	No evidence of disease
BOV-3097	DT	GT	Benign		73	-	Serous cystadenoma		+	No evidence of disease
BOV-3150	DT	GT	Benign		56	-	Adenofibroma		+	No evidence of disease
BOV-3268	DT	GT	Benign		48	-	Serous cystadenoma		+	No evidence of disease
N1781	T		Benign		66	-	Adenofibroma		+
TOV-107	GT		LMP		63	IA	Serous cystadenoma		+	No evidence of disease	Hypothyroidism
TOV-206	DT		LMP		28	IIIC	Serous cystic papillary		+	Complete remission	Previous diagnosis: G1 serous ovarian cancer on right ovary
TOV-306	DT		LMP		62	IIIC	Serous cystadenoma		+	Deceased	Benign ovarian tumour on left ovary
TOV-335	DT		LMP		44	IIIB	Serous cystadenoma		+	No followup
TOV-696	GT		LMP		41	IIIC	Serous cystadenoma		+	Complete remission
TOV-838	GT		LMP		38	IB	Serous adenofibroma		+	Complete remission
TOV-845	T		LMP		50	IIIC	Serous adenofibroma		+	Deceased	Endometriosis of uterus
TOV-916	T		LMP		65	IIIA	Serous cystic papillary		+	Progressive Disease	Concurrent diagnosis: Mixed endometrial adenocarcinoma (endometrioid and mucinous), low grade
TOV-920	DT	GT	LMP		45	IIIA	Serous cystadenoma		+	Complete remission
TOV-929 (B)	T		LMP		54	IIIA	Serous cystadenoma		+	Deceased
TOV-933	DT		LMP		77	IA	Serous cystadenoma		+	No followup	Hospitalized for delirium and placed under long term care
TOV-942	GT		LMP	LMP	58	IC	Serous cystadenoma		+	Deceased	Later diagnosis: Pancreas adenocarcinoma, 9 months later
TOV-978	DT		LMP		34	IA	Serous cystadenoma		+	Progressive Disease
TOV-984	DT		LMP		34	IB	Serous cystadenoma		+	Complete remission
TOV-991	DT	GT	LMP		67	IB	Serous cystic papillary		+	Progressive Disease	Previous diagnosis: Breast cancer; 3 years earlier. Later diagnosis: Intestinal sarcoma, 3 years later. Another cancer found in the intestine and an ovarian recurrance at the same time
TOV-1010	DT	GT	LMP		31	IB	Serous cystadenoma		+	Progressive Disease	Previous diagnosis: Breast cancer, 5 years later
TOV-1068	T		LMP		58	IIIC	Serous cystadenoma		+	Complete remission	Endometriosis of uterus
TOV-1101	GT		LMP		52	IIIC	Serous cystadenoma		+	Regression of disease	Hypothyroidism; Sister diagnosed with breast cancer
TOV-1112	T		LMP		69	IB	Serous adenofibroma		+	No evidence of disease	Bilateral serous cystadenofibroma with a small percentage (<10%) of serous borderline
TOV-1157	T		LMP		61	IA	Serous cystic papillary		+	No evidence of disease	Father diagnosed with lung cancer
TOV-1215	GT		LMP		27	IIIA	Serous cystadenoma		+	No evidence of disease	Later diagnosis: Serous cystadenocarcioma of the right ovary, G1, 4 yr later
TOV-1228	GT		LMP		42	IIIC	Serous cystadenoma		+	No evidence of disease
TOV-1267	DT		LMP		44	IIIA	Serous cystadenoma		+	No evidence of disease	Hypertension; Maternal grandmother diagnosed with breast cancer
TOV-1300	GT		LMP		47	IIIC	Serous cystadenoma		+	No evidence of disease	Grandmother diagnosed with uterine cancer; Aunt diagnosed with breast cancer
TOV-1319(A)	T		LMP		80	IA	Serous cystadenoma		+	No followup	Coagulation issues; Father diagnosed with cardiovascular disease and infarction
TOV-1533	GT		LMP		60	IA	Serous cystadenoma		+	Deceased	Obese. Benign serous tumour on right ovary. Brother diagnosed with throat cancer; Father diagnosed with lung cancer
TOV-1607	T		LMP		58	IB	Serous cystadenoma		+	No evidence of disease	Right ovary: composed of a small minority of mucinous cells
TOV-1615	DT		LMP		62	IA	Serous cystadenoma		+	Deceased
TOV-1685	GT		LMP	LMP	26	IA	Serous cystadenoma		+	Complete remission
TOV-1694	DT		LMP		71	IIIA	Serous cystadenoma		+	No evidence of disease
TOV-1775	DT	GT	LMP		49	IIIA	Serous cystadenoma		+	Recurrence	Brother diagnosed with Hogkin's lymphoma
TOV-1915	T		LMP		61	IA	Serous cystadenoma		+	No followup	Cardiac insufficiency, obesity, kidney insufficiency, infarction, hypertension, pulmonary edema; Brother diagnosed with prostate cancer
TOV-2005	DT		LMP		54	IA	Serous cystadenoma		+	No evidence of disease	Benign bilateral serous tumours
TOV-2173	T		LMP		49	IA	Serous cystadenoma		+	No evidence of disease	Endometriosis
TOV-2262	DT		LMP		62	IA	Serous adenofibroma		+	Complete remission	Previous diagnosis: Breast cancer 9 months earlier, chemo treated
TOV-2395	DT		LMP		33	IA	Serous cystadenoma		+	No evidence of disease
TOV-2563	DT		LMP		50	IB	Serous cystadenoma		+	No evidence of disease
TOV-3028	GT		LMP		74	IA	Serous adenofibroma		+	No evidence of disease
TOV-3094	GT		LMP		29	IIIC	Serous cystadenoma		+	No evidence of disease
TOV-3165	GT		LMP		35	IA	Serous cystadenoma		+	No evidence of disease
TOV-3423	GT		LMP		40	IIB	Serous cystadenoma		+	No evidence of disease
TOV-3492	DT		LMP		41	IIC	Serous cystadenoma		+	No evidence of disease
TOV-3546	DT		LMP		51	IIIC	Serous cystadenoma		+	Remission
TOV-3703	GT		LMP		69	IA	Serous cystadenoma		+	No evidence of disease
TOV-3882	DT		LMP		49	lllA	Serous		+	No followup	Previous case of infiltrating ductal carcinoma of breast, 3 months earlier
TOV-3922	GT		LMP		65	lA	Serous		+	No evidence of disease
TOV-3973	GT		LMP		62	lA	Serous		+	Remission	Previous case of LGSOC (stage III) on the opposite ovary
TOV-4054	DT	GT	LMP		50	lC	Serous		+	Complete remission
TOV-4105(A)	GT		LMP		66	lA	Serous		+	No followup	Family history of breast and colon cancer
TOV-4262	GT		LMP		26	llB	Serous		+	No evidence of disease	Slides were revised in 2003 and the diagnosis changed from benign to LMP
TOV-4269	DT		LMP		21	lllB	Serous		+	No evidence of disease
N3426-RT	DT		LMP		60		Papillary serous		+	No followup
N945	T		LMP		64	IIB	Papillary serous cystadenofibroma		+	No followup
635	T		LGOSC		48	IIIC	Papillary serous cystadenocarcinoma		+	No followup
682	T		LGOSC		40	IIIC	Serous papillary adenocarcinoma		+	No followup
832	T		LGOSC		37	IIIC	Papillary serous adenocarcinoma		+	No followup
TOV-490	T		LGOSC	HGOSC	71	IIIC	Papillary serous cystadenocarcinoma		+	Survived at least 17 mo	Family history of breast cancer, leukemia and colon cancer
TOV-553	EPT		LGOSC	HGOSC	48	IIIC	Serous cystadenocarcinoma		+	Deceased	Earlier diagnosis: borderline cancer of cervix
TOV-812	EPT		LGOSC	Metastatic serous	70	IIIC	Papillary carcinoma		+	Deceased	Ovarian origin in notes and record, but never confirmed by pathologist
TOV-81	DT		LGOSC	non invasive implant	66	IIIC	Papillary serous cystadenocarcinoma		+	Survived at least 98 mo	BRCA2 mutation positive. Diagnosed with breast cancer in 1999.
TOV-854	DT	GT	LGOSC		61	IIIC	Papillary serous cystadenocarcinoma		+	Deceased
TOV-947	DT		LGOSC	LMP	53	IA	Serous cystadenocarcinoma		+	Deceased	Diagnosed with endometrium and ovarian cancers concurrently. Later diagnosis: lung cancer.
TOV-1284	T		LGOSC		39	IIIC	Papillary serous cystadenocarcinoma		+	Deceased	Hypothyroidism, cervical disease treated by cryotherapy in 2000; Grandmother diagnosed with colon cancer
TOV-1949	T		LGOSC		52	IIIC	Papillary serous cystadenocarcinoma		+	Deceased	Asthma, depression
T, tumour; DT, tumour on right ovary; GT, tumour on left ovary; EPT, tumour on omentum

## Sheet: Sheet2
					Age au diagnostic	Topographie	Latéralité	Morphologie	Grade	Stade	Délai DX-Pr01 (M)	Sites Pr01	Date dernier contact	Date du décès	Cause de décès	Censure (0 = vivant, 1 = mort)	Survie (mois)
TOV-107 GT	LMP			107	63	Ovaire	Gauche	Cystadénome séreux, à la limite de la malignité	GB	IA	0		1999-07-05	AAAA-MM-JJ		0	81
TOV-206 DT	LMP			206	27	Ovaire	Gauche	Cystadénocarcinome papillaire séreux	G1	IIIC	0		2007-01-15	AAAA-MM-JJ		0	156
TOV-306 DT	LMP			206	28	Ovaire	Droite	Tumeur kystique papillaire séreuse à la limite de la malignité	GB	IIIC	0		2007-01-15	AAAA-MM-JJ		0	150
TOV-335 DT	LMP			306	62	Ovaire	Gauche	Adénofibrome séreux			0		1998-11-19	2002-09-24		1	88
TOV-696 GT	LMP			306	62	Ovaire	Gauche	Cystadénome séreux			0		1998-11-19	2002-09-24		1	88
TOV-838 GT	LMP			306	62	Ovaire	Droite	Cystadénome séreux, à la limite de la malignité	GB	IIIC	0		1998-11-19	2002-09-24		1	88
TOV-845 T	LMP			335	44	Ovaire	Droite	Cystadénome séreux, à la limite de la malignité	GB	IIIB	0		1995-09-07	AAAA-MM-JJ		0	2
TOV-916 T	LMP			696	41	Ovaire	Bilatérale	Cystadénome séreux, à la limite de la malignité	GB	IIIC	0		2007-09-06	AAAA-MM-JJ		0	115
TOV-920 DT	LMP			838	38	Ovaire	Bilatérale	Adénofibrome séreux à la limite de la malignité	GB	IB	0		2007-07-16	AAAA-MM-JJ		0	98
TOV-920 GT	LMP			845	50	Ovaire	Bilatérale	Adénofibrome séreux à la limite de la malignité	GB	IIIC	68	CA-125, Carcinomatose péritonéale	2008-09-02	AAAA-MM-JJ		0	111
TOV-929 BT	LMP			845	50	Endométriose de l'utérus	Site sans latéralité				0		2008-09-02	AAAA-MM-JJ		0	111
TOV-933 DT	LMP			916	65	Ovaire	Bilatérale	Tumeur kystique papillaire séreuse à la limite de la malignité	GB	IIIA	0	Ascite	2000-04-10	AAAA-MM-JJ		0	2
TOV-942 GT	LMP			920	45	Ovaire	Bilatérale	Cystadénome séreux, à la limite de la malignité	GB	IIIA	0		2008-04-07	AAAA-MM-JJ		0	98
TOV-984 DT	LMP			920	45	Salpingite et ovarite chroniques	Bilatérale				0		2008-04-07	AAAA-MM-JJ		0	98
TOV-991 DT	LMP			929	54	Ovaire	Gauche	Cystadénome séreux, à la limite de la malignité	GB	IIIA	0		2007-02-06	AAAA-MM-JJ		0	83
TOV-991 GT	LMP			933	77	Ovaire	Droite	Cystadénome séreux, à la limite de la malignité	GB	IA	0		2007-05-22	AAAA-MM-JJ		0	86
TOV-1010 DT	LMP			942	59	Pancréas	Site sans latéralité	Adénocarcinome	G1		4	Foie	2001-10-23	2001-10-25	Cancer du pancréas	1	10
TOV-1010 GT	LMP			942	58	Ovaire	Gauche	Cystadénome séreux, à la limite de la malignité	GB	IC	0		2001-10-23	2001-10-25	Cancer du pancréas	1	19
TOV-1068 T	LMP			984	34	Ovaire	Bilatérale	Cystadénome séreux, à la limite de la malignité	GB	IB	12	Trompe de Fallope droite: implants, Ovaire gauche	2007-11-09	AAAA-MM-JJ		0	89
TOV-1101 GT	LMP			991	67	Ovaire	Bilatérale	Tumeur kystique papillaire séreuse à la limite de la malignité	GB	IB	35	Péritoine: implants non invasifs	2003-06-10	AAAA-MM-JJ		0	35
TOV-1112 T	LMP			1010	31	Ovaire	Bilatérale	Cystadénome séreux, à la limite de la malignité	GB	IB	34	CA-125	2007-07-25	AAAA-MM-JJ		0	82
TOV-1157 T	LMP			1068	58	Ovaire	Bilatérale	Cystadénome séreux, à la limite de la malignité	GB	IIIC	0		2007-09-10	AAAA-MM-JJ		0	77
TOV-1215 GT	LMP			1068	59	Endométriose de l'utérus	Site sans latéralité				0		2007-09-10	AAAA-MM-JJ		0	72
TOV-1228 GT	LMP			1101	52	Ovaire	Bilatérale	Cystadénome séreux, à la limite de la malignité	GB	IIIC	0		2002-11-19	AAAA-MM-JJ		0	16
TOV-1267 DT	LMP			1112	69	Ovaire	Bilatérale	Adénofibrome séreux à la limite de la malignité	GB	IB	0		2007-08-27	AAAA-MM-JJ		0	72
TOV-1300 GT	LMP			1157	61	Ovaire	Droite	Tumeur kystique papillaire séreuse à la limite de la malignité	GB	IA	0		2006-12-06	AAAA-MM-JJ		0	59
TOV-1319 AT	LMP			1215	27	Ovaire	Gauche	Cystadénome séreux, à la limite de la malignité	GX	IIIA	47	Ovaire droit, Epiploon: implants non invasifs, Liquide du lavage péritonéal	2007-01-19	AAAA-MM-JJ		0	56
TOV-1533 GT	LMP			1228	42	Ovaire	Bilatérale	Cystadénome séreux, à la limite de la malignité	GB	IIIC	0		2007-04-23	AAAA-MM-JJ		0	58
TOV-1607 T	LMP			1267	44	Ovaire	Bilatérale	Cystadénome séreux, à la limite de la malignité	GB	IIIA	0		2007-04-13	AAAA-MM-JJ		0	43
TOV-1615 DT	LMP			1300	47	Ovaire	Bilatérale	Cystadénome séreux, à la limite de la malignité	GB	IIIC	0		2007-09-06	AAAA-MM-JJ		0	58
TOV-1685 GT	LMP			1319	80	Ovaire	Droite	Cystadénome séreux, à la limite de la malignité	GB	IA	0		2003-11-19	AAAA-MM-JJ		0	11
TOV-1694 DT	LMP			1319	76	Ovaire	Droite	Cystadénome mucineux			0		2005-03-14	AAAA-MM-JJ		0	25
TOV-1775 DT	LMP			1553	60	Ovaire	Droite	Cystadénome séreux		IA	0		2007-05-28	AAAA-MM-JJ		0	47
TOV-1775 GT	LMP			1553	60	Ovaire	Gauche	Cystadénome séreux, à la limite de la malignité	GB	IA	0		2007-05-28	AAAA-MM-JJ		0	47
TOV-1915 T	LMP			1607	58	Ovaire	Bilatérale	Cystadénome séreux, à la limite de la malignité	GB	IB	0		2005-02-04	AAAA-MM-JJ		0	18
TOV-2005 DT	LMP			1615	62	Ovaire	Droite	Cystadénome séreux, à la limite de la malignité	GB	IA	0		2005-09-18	AAAA-MM-JJ		0	25
TOV-2173 T	LMP			1685	26	Ovaire	Gauche	Cystadénome séreux, à la limite de la malignité	GB	IA	0		2007-08-06	AAAA-MM-JJ		0	46
TOV-2262 DT	LMP			1694	71	Ovaire	Bilatérale	Cystadénome séreux, à la limite de la malignité	GB	IIIA	0		2007-06-19	AAAA-MM-JJ		0	44
TOV-2395 DT	LMP			1775	49	Ovaire	Bilatérale	Cystadénome séreux, à la limite de la malignité	GB	IIIA	0		2007-03-21	AAAA-MM-JJ		0	40
TOV-2563 DT	LMP			1915	61	Ovaire	Droite	Cystadénome séreux, à la limite de la malignité	GB	IA	0		2004-04-28	AAAA-MM-JJ		0	2
TOV-3028 GT	LMP			2005	54	Ovaire	Bilatérale	Cystadénome séreux			0		2007-08-08	AAAA-MM-JJ		0	39
TOV-3094 GT	LMP			2005	54	Ovaire	Droite	Cystadénome séreux, à la limite de la malignité	GB	IA	0		2007-08-08	AAAA-MM-JJ		0	39
TOV-3165 GT	LMP			2173	49	Ovaire	Gauche	Cystadénome séreux, à la limite de la malignité	GB	IA	0		2007-09-27	AAAA-MM-JJ		0	36
TOV-3332 DT	LMP			2173	49	Endométriose de l'utérus	Site sans latéralité				0		2007-09-27	AAAA-MM-JJ		0	36
TOV-3423 GT	LMP			2262	62	Ovaire	Gauche	Adénofibrome séreux à la limite de la malignité	GB	IA	0		2007-06-18	AAAA-MM-JJ		0	30
TOV-3492 DT	LMP			2262	61	Sein	Gauche	Carcinome lobulaire			0		2007-06-18	AAAA-MM-JJ		0	39
TOV-3546 DT	LMP			2262	62	Ovaire	Droite	Tumeur kystique mucineuse à la limite de la malignité	GB	IA	0		2007-06-18	AAAA-MM-JJ		0	30
TOV-3703 GT	LMP			2262	62	Endométriose de l'ovaire	Droite				0		2007-06-18	AAAA-MM-JJ		0	30
TOV-3882 DT	LMP			2395	33	Ovaire	Droite	Cystadénome séreux, à la limite de la malignité	GB	IA	0		AAAA-MM-JJ	AAAA-MM-JJ		0	0
TOV-3922 GT	LMP			2563	50	Ovaire	Bilatérale	Cystadénome séreux, à la limite de la malignité	GB	IB	0		AAAA-MM-JJ	AAAA-MM-JJ		0	0
TOV-3973 GT	LMP			3028	74	Ovaire	Gauche	Adénofibrome séreux à la limite de la malignité	GB	IA	0		AAAA-MM-JJ	AAAA-MM-JJ		0	0
TOV-4054 DT	LMP			3094	29	Ovaire	Bilatérale	Cystadénome séreux, à la limite de la malignité	GB	IIIC	0		AAAA-MM-JJ	AAAA-MM-JJ		0	0
TOV-4054 GT	LMP			3165	35	Ovaire	Gauche	Cystadénome séreux, à la limite de la malignité	GB	IA	0		AAAA-MM-JJ	AAAA-MM-JJ		0	0
TOV-4105 G_A_T	LMP			3332	84	Ovaire	Droite	Cystadénome séreux, à la limite de la malignité	GB	IA	0		AAAA-MM-JJ	AAAA-MM-JJ		0	0
TOV-4262 GT	LMP			3423	40	Ovaire		Cystadénome séreux, à la limite de la malignité	GB	IIB	0		2007-05-16	AAAA-MM-JJ		0	0
TOV-4269 DT	LMP			3492	41	Ovaire	Bilatérale	Cystadénome séreux, à la limite de la malignité	GB	IIC	0		2008-07-02	AAAA-MM-JJ		0	12

## Sheet: Sheet3
3546	51	Ovaire	Atteinte initiale BILATÉRALE	Cystadénome séreux, à la limite de la malignité	pré-ménopausée	GB	pT1b	pN1	pMX	IIIC	AAAA-MM-JJ	AAAA-MM-JJ	2007-07-31	54	2008-10-08	9				AAAA-MM-JJ	0		2008-10-08	AAAA-MM-JJ		14	0
3703	69	Ovaire	GAUCHE: atteinte initiale	Cystadénome séreux, à la limite de la malignité	post-ménopausée	GB	pT1a	pN0	pMX	IA	AAAA-MM-JJ	AAAA-MM-JJ	2007-10-23	125	2008-08-04	10				AAAA-MM-JJ	0		2008-08-04	AAAA-MM-JJ		7	0
3882	49	Ovaire	DROITE: atteinte initiale	Cystadénome séreux, à la limite de la malignité	péri-ménopausée	GB	pT3a	pN0	pMX	IIIA	AAAA-MM-JJ	AAAA-MM-JJ	2008-03-26	427	2008-03-26	427				AAAA-MM-JJ	0		2009-01-12	AAAA-MM-JJ		8	0
3922	65	Ovaire	GAUCHE: atteinte initiale	Cystadénome séreux, à la limite de la malignité	post-ménopausée	GB	pT1a	pN0	pMX	IA	AAAA-MM-JJ	AAAA-MM-JJ	2008-02-28	113	2008-02-28	113			Non (CHIR)	AAAA-MM-JJ	0		2009-10-08	AAAA-MM-JJ		16	0
3973	62	Ovaire	GAUCHE: atteinte initiale	Cystadénome séreux, à la limite de la malignité	post-ménopausée	GB	pT1a	pN0	pMX	IA	AAAA-MM-JJ	AAAA-MM-JJ	2008-05-06	62	2008-05-06	62			N/S (CHIR)	AAAA-MM-JJ	0		2009-09-24	AAAA-MM-JJ		16	0
4054	50	Ovaire	Atteinte initiale BILATÉRALE	Cystadénome séreux, à la limite de la malignité	péri-ménopausée	GB	pT1c	pN0	pMX	IC	AAAA-MM-JJ	AAAA-MM-JJ	2008-08-12	37.5	AAAA-MM-JJ	-99			N/S (CHIR)	AAAA-MM-JJ	0		2010-01-18	AAAA-MM-JJ		16	0
4105	66	Ovaire	GAUCHE: atteinte initiale	Cystadénome séreux, à la limite de la malignité	post-ménopausée	GB	pT1a	pN0	pMX	IA	AAAA-MM-JJ	AAAA-MM-JJ	2008-10-21	128	2008-10-21	128				AAAA-MM-JJ	0		2009-08-17	AAAA-MM-JJ		9	0
4252	65	Endomètre	Site sans latéralité	Tumeur mixte Müllerienne	post-ménopausée	GX	pT3a	pN0	pMX	IIIA	2009-02-02	AAAA-MM-JJ	2008-12-11	61	2008-12-11	61				2009-06-12	8	Carcinomatose péritonéale, Hydronéphrose	2009-09-28	2009-09-28	Cancer de l'utérus	11	1
4262	26		BI	Borderline séreux bilatéral GB S3c		GB				3C
4269	21		G	récidive à l'ovaire droit d'un Borderline séreux de l'ovaire gauche en 2005
N3426	60		BI	papillary serous
N945	64		BI	papillary serous cystadenofibroma						IIB
