# Supplementary material for: Chromosome 3 Anomalies Investigated by Genome Wide SNP Analysis of Benign, Low Malignant Potential and Low Grade Ovarian Serous Tumours
Source: PLoS One. 2011 Dec 6;6(12):e28250. doi: 10.1371/journal.pone.0028250 (PMC3232202; doi:10.1371/journal.pone.0028250)
Supplement: Table S2 — Homozygous deletions observed in all samples. (XLS) [file pone.0028250.s002.xls]

## Sheet: Sheet1
Supplementary Table 2. Homozygous deletions observed in all samples.
Chr	Flanking Markers	Genomic Location*	Cytoband	Size (bp)	# Markers within Deletion	Nearest Upstream Gene	Genes Included	Gene Name	Nearest Downstream Genes	High Grade Amplifications	Homozygous Deletions	Benign	LMP	LGSOC
1	rs11578202;rs12567327	86,392,577-86,407,135	1p22.3	14,559 bp	5	ZNHIT6	COL24A1	collagen, type XXIV, alpha 1 precursor	ODF2L	0	0		TOV-838 GT
													TOV-4269 DT
													TOV-933 DT
1	rs9726566;rs828505	149,025,760-149,168,798	1q21.2	143,039 bp	8	LOC645166	-	-	LOC388692	7	25		TOV-1228 GT	832T
													TOV-2563 DT
													TOV-4054 DT
													TOV-4054 GT
1	rs2157597;rs12121994	169,201,567-169,258,306	1q24.2	56,740 bp	3	ATP1B1†	NME7	nucleoside diphosphate kinase 7 isoform a	BLZF1	3	1	BOV-1588 DT	TOV-306 DT	TOV-490
												BOV-1588 GT	TOV-916T	TOV-81 DT
												BOV-3097 DT	TOV-1010 DT
												BOV-3097 GT	TOV-1010 GT
												BOV-2328 DT	TOV-4269 DT
													TOV-696 GT
													TOV-1068T
													TOV-1300 GT
													TOV-3094 GT
													TOV-3922 GT
													TOV-2262 DT
													TOV-2173T
													TOV-3546 DT
2	rs1983365;rs1175861	4,198,741-4,224,068	2p25.3	25,328 bp	6/7	ALLC	-	-	LOC727982	2	22	BOV-2506 DT
2	rs869817;rs17546105	12,016,999-12,031,541	2p25.1	14,543 bp	4	LPIN1*	-	-	TRIB2*	3	0		TOV-933 DT
2	rs4666167;rs3099566	29,355,303-29,362,432	2p23.2	7,130 bp	3	C2ORF71	CLIP4*	CAP-GLY domain containing linker protein family, member 4	ALK	1	0		TOV-4262 GT
2	rs7583467;rs7581230	34,691,083-34,738,616	2p22.3	47,534 bp	5	MYADML	-	-	LOC100288911	3	75	BOV-1588 DT	TOV-1101 GT
												BOV-1588 GT	TOV-4269 DT
												BOV-3150 DT	TOV-942 GT
												BOV-3150 GT	TOV-1615 DT
												BOV-3268 DT	TOV-1607T
												BOV-3268 GT	TOV-3882 DT
												BOV-2418 GT	TOV-2262 DT
												BOV-1761 GT	TOV-1915T
													TOV-3546 DT
2	rs17032055;rs9752494	44,459,230-44,468,919	2p21	9,690 bp	4	LRPPRC†	PPM1B	protein phosphatase, Mg2+/Mn2+ dependent, 1B	SLC3A1	0	0		TOV-920 DT
													TOV-920 GT
													N945T
2	rs17864582;rs1028145	51,922,567-51,928,042	2p16.3	5,476 bp	8	NRXN1	-	-	ASB3	1	0	BOV-1172 DT
												BOV-1172 GT
2	rs7557580;rs6545286	52,748,425-52,785,456	2p16.3	37,032 bp	4	NRXN1	-	-	ASB3	3	110	BOV-1207 DT	TOV-3922 GT	TOV-490
												BOV-2506 DT	TOV-978
2	rs1011572;rs12328023	53,551,600-53,561,575	2p16.2	9,976 bp	3	NRXN1	-	-	ASB3				TOV-916T
2	rs11891325;rs170318	146,862,085-146,880,933	2q22.3	18,849 bp	3	DKFZp68601327	-	-	PABPC1P2	0	42	BOV-392 DT	TOV-206 DT	TOV-854 DT
												BOV-392 GT	TOV-1010 DT	TOV-854 GT
												BOV-3150 DT	TOV-1010 GT	TOV-812EPT
												BOV-3150 GT	TOV-3165 GT
													TOV-1267 DT
													TOV-107 GT
													TOV-2395 DT
													TOV-1300 GT
													TOV-1607T
													TOV-3922 GT
													TOV-2173T
													TOV-3546 DT
													N3426T-RT
													TOV-4105G_A_T
2	rs7596050;rs1462531	184,084,221-184,095,979	2q32.1	11,759 bp	3	NUP35	-	-	ZNF804A	0	2		TOV-916T
2	rs981901;rs2042484	208,349,258-208,363,062	2q33.3	13,805 bp	8	KLF7*	-	-	CREB1*	1	5		TOV-335 DT
													TOV-2005 DT
													TOV-3423 GT
2	rs12615852;rs12469535	242,974,521-243,044,147	2q37.3	69,627 bp	8	C2ORF85	LOC728323	hypothetical LOC728323	End	0	8		TOV-845T
3	rs1499065;cnvi0011095			5,302 bp	4	EDEM1*	-	-	GRM7	0	16	BOV-1761 GT	TOV-696 GT	TOV-553EPT
														TOV-1284
3	rs9832305;rs6782527	89,392,778-89,442,369	3p11.1	49,592 bp	7	C3ORF38	EPHA3	EPH receptor A3	Centromere	3	8	BOV-3057 DT
												BOV-3057 GT
3	rs13076500;rs17770503	98,943,479-98,952,443	3q12.1	8,965 bp	3	DCBLD2	-	-	COL8A1	1	34	BOV-1588 DT	TOV-916T	832T
												BOV-1588 GT	TOV-4269 DT	TOV-490
3	rs2699857;rs1320900	131,702,343-131,713,566	3q22.1	11,224 bp	3	MRPL3*†	CPNE4	copine IV	ACPP	1	0	BOV-1588 DT	TOV-1615 DT
												BOV-1588 GT	TOV-978
3	rs206280;rs206276	162,511,139-162,626,585	3q26.1	115,447 bp	8	OTOL1	-	-	LOC647107	34	31	BOV-1588 DT	TOV-3165 GT	832T
												BOV-1588 GT	TOV-1615 DT
												BOV-3097 DT	TOV-1300 GT
												BOV-3097 GT	TOV-3546 DT
													TOV-4105G_A_T
3	rs9834518;rs967119	189,735,222-189,744,621	3q28	9,400 bp	5	TP63	LEPREL1	leprecan-like 1	CLDN1*	2	1	BOV-2889 DT	TOV-3492 DT
												BOV-2889 GT	TOV-3882 DT
												BOV-3057 DT
												BOV-3057 GT
												BOV-3097 DT
												BOV-3097 GT
												BOV-2331 GT
3	rs4677735;rs523270	191,064,528-191,073,228	3q28	8,701 bp	8	UTS2D	CCDC50*	coiled-coil domain containing 50	PYDC2	1	1	BOV-1172 DT	TOV-4269 DT	TOV-1284
												BOV-1172 GT	TOV-1533 GT
													TOV-3028 GT
													TOV-4262 GT
3	rs4894485;rs12634318	175,077,686-175,086,544	3q26.31	8,859 bp	4	NLGN1	NAALADL2	N-acetylated alpha-linked acidic dipeptidase-like 2	TBL1XR1	1	1		TOV-978
4	rs11724536;rs4530622	10,390,289-10,402,838	4p16.1	12,550 bp	6	WDR1	-	-	ZNF518B	0	12		TOV-2563 DT	TOV-490
													TOV-3492 DT
													TOV-3882 DT
													TOV-3922 GT
													TOV-4054 DT
													TOV-4054 GT
4	rs12507186;rs4380521	19,517,296-19,535,243	4p15.31	17,948 bp	3	LCORL	-	-	SLIT2	2	1	BOV-846 DT	TOV-978	TOV-553EPT
												BOV-846 GT	TOV-206 DT	TOV-947 DT
												BOV-1172 DT	TOV-306 DT	635T
												BOV-1172 GT	TOV-838 GT	832T
												BOV-2314 DT	TOV-845T	682T
												BOV-2314 GT	TOV-916T	TOV-490
												BOV-2889 DT	TOV-1694 DT	TOV-1284
												BOV-2889 GT	TOV-991 DT	TOV-81 DT
												BOV-3057 DT	TOV-991 GT	TOV-1949T
												BOV-3057 GT	TOV-1010 DT
												BOV-3097 DT	TOV-1010 GT
												BOV-3097 GT	TOV-696 GT
												BOV-3150 DT	TOV-335 DT
												BOV-3150 GT	TOV-933 DT
												BOV-2418 GT	TOV-1215 GT
												BOV-2023 DT	TOV-1533 GT
												BOV-2328 DT	TOV-1615 DT
												BOV-1332 DT	TOV-1685 GT
												BOV-1207 DT	TOV-984 DT
												BOV-1296 DT	TOV-1300 GT
													TOV-1607T
													TOV-3028 GT
													TOV-3094 GT
													TOV-3423 GT
													TOV-3882 DT
													TOV-1157T
													TOV-2262 DT
													N945TB02
													TOV-3703 GT
													TOV-1319AT
													TOV-1915T
													TOV-2173T
													TOV-3546 DT
													TOV-929BT
													TOV-1112T
													TOV-4054 DT
													TOV-4054 GT
4	rs884770;rs11733205	20,447,040-20,458,688	4p15.31	11,649 bp	3	LCORL	SLIT2	slit homolog 2 (Drosophila)	PACRGL*	2	2			TOV-490
4	rs6855328;rs7678322	34,779,637-34,831,143	4p15.1	51,507 bp	4	PCDH7*	-	-	ARAP2	1	58		TOV-1694 DT	TOV-854 DT
													TOV-933 DT	TOV-854 GT
													TOV-3882 DT
													TOV-3922 GT
4	rs11722241;rs28442201	63,663,153-63,684,558	4q13.1	21,406 bp	5	LPHN3	-	-	TECRL	0	0		TOV-845T
													TOV-1267 DT
													TOV-335 DT
													TOV-1685 GT
													TOV-2395 DT
4	rs17636490;rs4560443	64,668,177-64,716,361	4q13.1	48,185 bp	7	LPHN3	-	-	TECRL	0	1	BOV-2889 DT	TOV-991 DT	635T
												BOV-2889 GT	TOV-991 GT	TOV-490
													TOV-1010 DT
													TOV-1010 GT
													TOV-107 GT
													TOV-1685 GT
													TOV-2395 DT
													TOV-984 DT
													TOV-3973 GT
													TOV-1915T
													TOV-2173T
4	cnvi0021042;rs34187424	69,047,457-69,179,871	4q13.2	132,415 bp	21/28 (or '10/28)	TMPRSS11E	UGT2B17	UDP glucuronosyltransferase 2 family, polypeptide B17	UGT2B15	5	98	BOV-2889 DT	TOV-933 DT	635T
												BOV-2889 GT	TOV-2005 DT	TOV-490
												BOV-3150 DT	TOV-3973 GT
												BOV-3150 GT	TOV-1319AT
												BOV-2418 GT
4	rs28625386;rs7693378	70,129,929-70,234,419	4q13.2	104,491 bp	6/7	UGT2B11	UGT2B28	UDP glucuronosyltransferase 2 family, polypeptide B28	UGT2B4	0	44	BOV-3097 DT
												BOV-3097 GT
4	rs9998695;rs4470706	115,172,667-115,188,501	4q26	15,835 bp	6	ARSJ*	-	-	UGT8*	1	1	BOV-392 DT	TOV-978	832T
												BOV-392 GT	TOV-206 DT	TOV-490
												BOV-3097 DT	TOV-920 DT
												BOV-3097 GT	TOV-920 GT
												BOV-3150 DT	TOV-942 GT
												BOV-3150 GT	TOV-1068T
												BOV-1207 DT	TOV-1775 GT
												BOV-1761 GT	TOV-1775 DT
													TOV-984 DT
													TOV-3492 DT
													TOV-4262 GT
													TOV-1157T
													TOV-1319AT
													TOV-2173T
													TOV-929BT
													TOV-1112T
4	rs1507939;rs950206	116,165,372-116,180,555	4q26	15,184 bp	4	NDST4	-	-	TRAM1L1	1	2			TOV-854 DT
														TOV-854 GT
4	rs10518388;rs2013332	122,280,335-122,291,522	4q27	11,188 bp	5	TNIP3	QRFPR	pyroglutamylated RFamide peptide receptor	ANXA5*	0	10		TOV-1112T
4	rs13122589;rs7676691	134,127,276-134,139,650	4q28.3	12,375 bp	3	PCDH10	-	-	PABPC4L	0	0	BOV-392 DT	TOV-206 DT	TOV-553EPT
												BOV-392 GT	TOV-306 DT	TOV-854 DT
												BOV-846 DT	TOV-838 GT	TOV-854 GT
												BOV-846 GT	TOV-845T	635T
												BOV-1172 DT	TOV-916T	832T
												BOV-1172 GT	TOV-1101 GT	682T
												BOV-1588 DT	TOV-1694 DT	TOV-490
												BOV-1588 GT	TOV-920 DT	TOV-812EPT
												BOV-2314 DT	TOV-920 GT	TOV-81 DT
												BOV-2314 GT	TOV-991 DT
												BOV-2889 DT	TOV-991 GT
												BOV-2889 GT	TOV-1010 DT
												BOV-3097 DT	TOV-1010 GT
												BOV-3097 GT	TOV-3165 GT
												BOV-3150 DT	TOV-4269 DT
												BOV-3150 GT	TOV-1267 DT
												BOV-3268 DT	TOV-696 GT
												BOV-3268 GT	TOV-107 GT
												BOV-2418 GT	TOV-335 DT
												BOV-2023 DT	TOV-942 GT
												BOV-2328 DT	TOV-1068T
												BOV-1332 DT	TOV-1215 GT
												BOV-1207 DT	TOV-1228 GT
												BOV-2506 DT	TOV-1533 GT
												BOV-1296 DT	TOV-1615 DT
												BOV-1761 GT	TOV-1685 GT
												1781T-A	TOV-1775 GT
												1781T-B	TOV-1775 DT
													TOV-2005 DT
													TOV-1300 GT
													TOV-1607T
													TOV-2563 DT
													TOV-3028 GT
													TOV-3094 GT
													TOV-3423 GT
													TOV-3882 DT
													TOV-3922 GT
													TOV-3973 GT
													TOV-4262 GT
													TOV-1157T
													TOV-2262 DT
													N945TB02
													TOV-1319AT
													TOV-1915T
													TOV-2173T
													TOV-3546 DT
													N3426T-RT
													TOV-929BT
													TOV-4105G_A_T
													TOV-1112T
4	rs1399494;rs1913606	138,090,768-138,103,313	4q28.3	12,546 bp	4	PABPC4L	-	-	PCDH18	2	0		TOV-933 DT	TOV-490
													TOV-1685 GT	TOV-1284
													TOV-3094 GT
													TOV-2262 DT
4	rs4128879;rs12503470	161,878,992-161,889,983	4q32.2	10,992 bp	5	RAPGEF2		-	FSTL5	2	18	BOV-2331 GT	N3426T-RT	TOV-553EPT
4	rs1394859;rs2877689	172,985,760-172,999,916	4q34.1	14,157 bp	3	HSP90AA6P	GALNTL6	UDP-N-acetyl-alpha-D-galactosamine: polypeptide N-acetylgalactosaminyl-transferase-like 6	GALNT7*	0	0	BOV-1588 DT	BOV-1296 DT	TOV-553EPT
												BOV-1588 GT	TOV-306 DT	635T
												BOV-3057 DT	TOV-916T
												BOV-3057 GT	TOV-1101 GT
												BOV-3150 DT	TOV-1694 DT
												BOV-3150 GT	TOV-920 DT
												BOV-2331 GT	TOV-920 GT
													TOV-1300 GT
													TOV-2563 DT
													N945TB02
													TOV-1319AT
													TOV-1112T
													TOV-4054 DT
													TOV-4054 GT
5	rs4374757;rs4571472	15,719,350-15,721,360	5p15.1	2,011 bp	4	ANKH	FBXL7*	F-box and leucine-rich repeat protein 7	MARCH11	13	6		TOV-306 DT
5	rs1512544;rs2942274	19,362,891-19,382,055	5p14.3	19,165 bp	3	LOC401177	-	-	CDH18	11	0	BOV-2023 DT	TOV-920 DT	TOV-854 DT
												BOV-2328 DT	TOV-920 GT	TOV-854 GT
												BOV-2331 GT	TOV-991 DT
												BOV-1332 DT	TOV-991 GT
													TOV-107 GT
													TOV-335 DT
													TOV-1215 GT
													TOV-1615 DT
													TOV-3922 GT
													N945TB02
													N3426T-RT
5	rs7732187;rs4421076	27,424,981-27,447,863	5p14.1	22,883 bp	3	CDH9	-	-	LOC729862	13	1		TOV-838 GT	TOV-490
													TOV-920 GT
5	rs9327067;rs11744938	117,386,434-117,400,779	5q23.1	14,346 bp	6	SEMA6A	-	-	DTWD2	1	3		TOV-4054 DT
													TOV-4054 GT
5	rs4704943;rs12187915	155,470,446-155,500,631	5q33.2	30,186 bp	3	KIF4B	-	-	SGCD	0	3	BOV-3057 DT
												BOV-3057 GT
5	cnvi0015422;rs6867096	180,307,066-180,343,674	5q35.3	36,609 bp	3	ZFP62	BTNL8	butyrophilin-like 8	BTNL3	2	20	BOV-1332 DT	TOV-1694 DT	TOV-1284
													TOV-991 DT
													TOV-991 GT
													TOV-1228 GT
													TOV-2005 DT
													TOV-3028 GT
													TOV-3922 GT
													TOV-3973 GT
													TOV-3703 GT
6	rs9350099;rs926274	19,039,776-19,051,695	6p22.3	11,920 bp	4	MIR458A1	-	-	ID4	2	0		TOV-3165 GT
6	rs2734959;rs9260101	29,849,687-29,909,559	6p22.1	59,873 bp	38/55	HLA-G	HLA-H	major histocompatibility complex, class I, H (pseudogene)	HLA-A	1	48	BOV-2889 DT
							HCG2P7	HLA complex group 2 pseudogene 7				BOV-2889 GT
							HCG4P6	HLA complex group 4 pseudogene 6				BOV-1332 DT
												BOV-2506 DT
6	rs28520918;rs9391820	31,275,846-31,280,101	6p21.33	4,256 bp	3	HLA-C*	-	-	HLA-B*	2	0		TOV1157T
6	rs7755852;rs9265170	31,277,988-31,289,284	6p21.33	11,297 bp	12/14	HLA-C*	-	-	HLA-B*	2	0	BOV-1332 DT
6	rs28752792;rs13191935	31,290,806-31,299,739	6p21.33	8,934 bp	6/7	HLA-C*	-	-	HLA-B*	2	0	BOV-3150 GT
6	rs1557551;rs1141866	32,452,190-32,485,492	6p21.32	33,303 bp	17/26	HLA-DRA	HLA-DRB5	major histocompatibility complex, class II, DR beta 5	HLA-DRB6	7	0	BOV-392 DT	TOV-978	TOV-553EPT
												BOV-392 GT	TOV-206 DT	TOV-947 DT
												BOV-846 DT	TOV-306 DT	832T
												BOV-846 GT	TOV-838 GT	682T
												BOV-1172 DT	TOV-845T	TOV-490
												BOV-1172 GT	TOV-916T	TOV-812EPT
												BOV-1588 DT	TOV-920 DT	TOV-1284
												BOV-1588 GT	TOV-920 GT	TOV-1949T
												BOV-2889 DT	TOV-991 DT
												BOV-2889 GT	TOV-991 GT
												BOV-3057 DT	TOV-1010 DT
												BOV-3057 GT	TOV-1010 GT
												BOV-3097 DT	TOV-4269 DT
												BOV-3097 GT	TOV-335 DT
												BOV-3150 DT	TOV-942 GT
												BOV-3150 GT	TOV-1215 GT
												BOV-3268 DT	TOV-1228 GT
												BOV-3268 GT	TOV-1615 DT
												BOV-2418 GT	TOV-1775 GT
												BOV-2023 DT	TOV-1775 DT
												BOV-2331 GT	TOV-2005 DT
												BOV-2506 DT	TOV-2395 DT
												BOV-1296 DT	TOV-1300 GT
												BOV-1761 GT	TOV-1607T
												1781T-A	TOV-2563 DT
												1781T-B	TOV-3028 GT
													TOV-3094 GT
													TOV-3423 GT
													TOV-3492 DT
													TOV-3882 DT
													TOV-3922 GT
													TOV-1157T
													TOV-2262 DT
													N945TB02
													TOV-3703 GT
													TOV-1319AT
													TOV-2173T
													TOV-3546 DT
													N3426T-RT
													TOV-929BT
													TOV-4105G_A_T
													TOV-1112T
													TOV-4054 DT
													TOV-4054 GT
6	rs35265698;rs11754183	32,561,334-32,566,156	6p21.32	4,823 bp	3	HLA-DRB1	-	-	HLA-DQA1					832T
														TOV-1284
6	rs9274741;rs1794508	32,637,994-32,644,859	6p21.32	6,866 bp	4/5	HLA-DQB1	-	-	HLA-DQA2	0	0	BOV-1296 DT	TOV-2262 DT
6	rs9469655;rs2495975	33,935,903-33,944,014	6p21.31	8,112 bp	4/5	MLN	-	-	MIR1275	1	0		TOV-306 DT
6	rs1890325;rs10943534	78,965,525-79,041,633	6q14.1	76,109 bp	31	HTR1B	-	-	IRAK1BP1	0	82	BOV-1207 DT	TOV-916T
													TOV-335 DT
6	rs2749135;rs11155845	101,491,425-101,507,345	6q16.3	15,921 bp	3	ASCC3	-	-	GRIK2	0	0			TOV-1949T
6	rs492132;rs12194183	117,643,433-117,885,959	6q22.1	242,527 bp	70/74	VGLL2	ROS1	c-ros oncogene 1 , receptor tyrosine kinase	NUS1	0	1		TOV-4054 DT
							DCBLD1	discoidin, CUB and LCCL domain containing 1
							GOPC	golgi-associated PDZ and coiled-coil motif containing
6	rs9374781;rs606955	119,444,784-119,457,914	6q22.31	13,131 bp	3	MCM9	FAM184A	family with sequence similarity 184, member A	MAN1A1*	1	0			TOV-490
6	rs9495410;rs7752712	139,602,317-139,607,136	6q24.1	4,820 bp	3	HECA	TXLNB	taxilin beta	CITED2	1	0		TOV-3165 GT	TOV-553EPT
6	rs6900527;rs7761698	149,437,584-149,442,245	6q25.1	4,662 bp	3	UST	-		TAB2	0	0			TOV-490
7	rs12707455;rs17155547	81,441,324-81,448,657	7q21.11	7,334 bp	3	HGF	-	-	CACNA2D1	6	0	BOV-1588 DT	TOV-916T	635T
												BOV-1588 GT	TOV-4269 DT	TOV-490
												BOV-3150 DT	TOV-335 DT
												BOV-3150 GT	TOV-1068T
												BOV-2418 GT	TOV-1775 GT
												BOV-1761 GT	TOV-1775 DT
													TOV-2395 DT
													TOV-984 DT
													TOV-1300 GT
													TOV-3094 GT
													TOV-3882 DT
													TOV-2262 DT
													TOV-1319AT
													TOV-1915T
													N3426T-RT
7	rs10226698;rs2078032	93,326,060-93,334,446	7q21.3	8,387 bp	5/6	CALCR	-	-	TFPI2*	9	0	BOV-846 DT		682T
												BOV-846 GT		TOV-81 DT
7	rs10085387;rs11763921	97,389,030-97,404,277	7q21.3	15,248 bp	3	TAC1	-	-	ASNS	6	4	BOV-2328 DT
7	rs10238549;rs4727740	110,181,022-110,192,161	7q31.1	11,140 bp	3	EIF3IP1	-	-	IMMP2L	6	1	BOV-392 DT	TOV-1694 DT	635T
												BOV-392 GT	TOV-3028 GT	682T
													TOV-3094 GT	TOV-81 DT
													TOV-3423 GT
													TOV-3973 GT
													N3426T-RT
7	rs7797360;rs4259331	141,763,866-141,794,790	7q34	30,925 bp	11/12	TAS2R38	MGAM	maltase-glucoamylase (alpha-glucosidase)	LOC93432	5	18	BOV-3150 DT	TOV-3882 DT	635T
												BOV-3150 GT	TOV-2173T	TOV-490
8	rs2051889;rs4045957	198,583-219,868	8p23.3	21,286 bp	3	ZNF596	-	-	FBXO25	1	4	TOV-1685 GT
8	rs1669716;rs4735895	593,707-600,729	8p23.3	7,023 bp.	3	C8ORF42	-	-	ERICH1	1	3	BOV-392 DT	TOV-978	TOV-553EPT
												BOV-392 GT	TOV-306 DT	TOV-854 DT
												BOV-1172 DT	TOV-838 GT	TOV-854 GT
												BOV-1172 GT	TOV-916T	TOV-947 DT
												BOV-1588 DT	TOV-1101 GT	635T
												BOV-1588 GT	TOV-920 DT	832T
												BOV-2314 DT	TOV-920 GT	682T
												BOV-2314 GT	TOV-991 DT	TOV-490
												BOV-2889 DT	TOV-991 GT	TOV-812EPT
												BOV-2889 GT	TOV-1010 DT	TOV-1284
												BOV-3057 DT	TOV-1010 GT	TOV-81 DT
												BOV-3057 GT	TOV-3165 GT	TOV-1949T
												BOV-3150 DT	TOV-696 GT
												BOV-3150 GT	TOV-107 GT
												BOV-2418 GT	TOV-335 DT
												BOV-2328 DT	TOV-1068T
												BOV-2331 GT	TOV-1215 GT
												BOV-1332 DT	TOV-1228 GT
												BOV-1207 DT	TOV-1533 GT
												BOV-1296 DT	TOV-1775 GT
												BOV-1761 GT	TOV-1775 DT
												1781T-A	TOV-2005 DT
												1781T-B	TOV-1300 GT
													TOV-1607T
													TOV-3028 GT
													TOV-3094 GT
													TOV-3423 GT
													TOV-3882 DT
													TOV-3922 GT
													TOV-4262 GT
													TOV-1157T
													TOV-2262 DT
													N945TB02
													TOV-1319AT
													TOV-1915T
													N3426T-RT
													TOV-929BT
													TOV-4105G_A_T
													TOV-1112T
8	rs4875192;rs1444613	3,187,176-3,196,871	8p23.2	9,696 bp	6/7	MYOM2	CSMD1	CUB and Sushi multiple domains 1	MCPH1	1	3		TOV-1685 GT
8	rs13266649;rs10086848	3,393,482-3,403,390	8p23.2	9,909 bp	3	MYOM2	CSMD1	CUB and Sushi multiple domains 1	MCPH1	0	0		TOV-1685 GT
8	rs859815;rs1635627	5,593,343-5,607,156	8p23.2	13,814 bp	9	CSMD1	-	-	MCPH1	1	20		TOV-1068T
													TOV-1607T
8	rs10088400;rs7829181	39,231,634-39,390,219	8p11.22	158,586 bp	19	ADAM32	ADAM5P	ADAM metallopeptidase domain 5, pseudogene	ADAM18	10	147	BOV-1172 DT	TOV-978	TOV-553EPT
												BOV-1172 GT	TOV-916T	635T
												BOV-3057 DT	TOV-107 GT	TOV-812EPT
												BOV-3057 GT	TOV-942 GT	TOV-1284
							ADAM3A	ADAM metallopeptidase domain 3A				BOV-3268 DT	TOV-1068T	TOV-81 DT
												BOV-3268 GT	TOV-1228 GT	TOV-1949T
												BOV-2023 DT	TOV-2395 DT
													TOV-3882 DT
8	rs1903311;rs10095718	51,029,371-51,040,022	8q11.21	10,652 bp	3	C8ORF22	SNTG1	syntrophin, gamma 1	PXDNL	2	1	BOV-1332 DT
												BOV-1207 DT
8	rs10092844;rs1900075	72,213,290-72,218,182	8q13.3	4,893 bp	6/7	XKR9	EYA1	eyes absent homolog 1 (Drosophila)	MSC	2	0	BOV-3150 DT	TOV-838 GT	635T
												BOV-3150 GT	TOV-1215 GT
												1781T-A	TOV-2563 DT
												1781T-B	TOV-1915T
													TOV-2173T
													TOV-3546 DT
8	rs10955722;rs6469536	115,626,102-115,650,409	8q23.3	24,308 bp	7	CSMD3	-	-	TRPS1	11	40		TOV-1010 DT	682T
													TOV-1010 GT
9	rs10739110;rs7865244	6,697,128-6,715,730	9p24.1	18,603 bp	3	GLDC	-	-	KDM4C	4	0			TOV-490
9	rs1582078;rs1577436	11,404,656-11,414,180	9p23	9,525 bp	3	PTPRD	-	-	TYRP1	5	8	BOV-1588 DT	TOV-1101 GT	832T
												BOV-1588 GT	TOV-107 GT	TOV-1949T
												BOV-2889 DT	TOV-1607T
												BOV-2889 GT	TOV-3882 DT
												BOV-2328 DT	TOV-2262 DT
													TOV-929BT
													TOV-4105G_A_T
9	rs10960291;rs10960390	11,827,014-11,948,271	9p23	121,258 bp	38/39	PTPRD	-	-	TYRP1	5	10			TOV-490
9	rs10810866;rs2891114	17,902,936-17,918,806	9p22.2	15,871 bp	3	SH3GL2	-	-	ADAMTSL1	4	2	BOV-392 DT	TOV-978	TOV-553EPT
												BOV-392 GT	TOV-206 DT	TOV-854 DT
												BOV-846 DT	TOV-838 GT	TOV-854 GT
												BOV-846 GT	TOV-916T	TOV-947 DT
												BOV-1172 DT	TOV-920 DT	635T
												BOV-1172 GT	TOV-4269 DT	TOV-490
												BOV-1588 DT	TOV-1267 DT	TOV-1949T
												BOV-1588 GT	TOV-696 GT
												BOV-2314 DT	TOV-107 GT
												BOV-2314 GT	TOV-335 DT
												BOV-3057 DT	TOV-933 DT
												BOV-3057 GT	TOV-1068T
												BOV-3097 DT	TOV-1215 GT
												BOV-3097 GT	TOV-1228 GT
												BOV-3268 DT	TOV-1775 GT
												BOV-3268 GT	TOV-2005 DT
												BOV-2418 GT	TOV-2395 DT
												BOV-2023 DT	TOV-920 GT
												BOV-2328 DT	TOV-984 DT
												BOV-1332 DT	TOV-1775 DT
												BOV-2506 DT	TOV-2563 DT
												BOV-1296 DT	TOV-3028 GT
												BOV-1761 GT	TOV-3423 GT
												1781T-A	TOV-3492 DT
												1781T-B	TOV-3882 DT
													TOV-1157T
													TOV-2262 DT
													N945TB02
													TOV-3703 GT
													TOV-1319AT
													TOV-1915T
													TOV-2173T
													TOV-3546 DT
													N3426T-RT
9	cnvi0002247;rs4007635	22,483,978-22,492,851*	9p21.3	8,874 bp	3	DMRTA1	-	-	ELAVL2	1	85	BOV-1588 DT	TOV-306 DT	TOV-553EPT
												BOV-1588 GT	TOV-1533 GT	TOV-1284
												1781T-A	TOV-3492 DT
												1781T-B	TOV-1157T
													TOV-2173T
													TOV-1112T
9	rs10757517;rs10511753	25,283,201-25,286,650	9p21.3	3,450 bp	3	ELAVL2	-		C9ORF82	3	28			TOV-490
	rs4149303;rs2065412	107,594,515-107,598,740	9q31.1	4,226 bp	3	LOC286367	ABCA1	ATP-binding cassette, sub-family A (ABC1), member 1	SLC44A1	1	0			635T
9	rs11788366;rs12237388	119,262,628-119,287,555	9q33.1	24,928 bp	3	PAPPA	ASTN2	astrotactin 2	TRIM32	0	0		TOV-4262 GT
9	rs4837957;rs4333683	119,629,567-119,638,009	9q33.1	8,443 bp	3	PAPPA	ASTN2	astrotactin 2	TRIM32	0	0			TOV-490
9	rs10987467;rs7026747	129,515,924-129,523,907	9q33.3	7,984 bp	4	LMX1B	-	-	ZBTB43	0	0	BOV-2506 DT	TOV-3703 GT	TOV-1949T
10	rs7081156;rs12355783	20,842,031-20,863,245	10p12.31	21,215 bp	7	PLXDC2	-	-	NEBL*	0	0		TOV-306 DT
													TOV-838 GT
													TOV-1228 GT
													TOV-2395 DT
													TOV-2563 DT
													TOV-3492 DT
													TOV-1157T
													TOV-3703 GT
10	rs7086430;rs16913596	54,012,431-54,023,829	10q21.1	11,399 bp	3	A1CF	PRKG1	protein kinase, cGMP-dependent, type I	DKK1	1	0	BOV-3057 DT	TOV-991 DT	TOV-812EPT
												BOV-3057 GT	TOV-335 DT
												BOV-2418 GT	TOV-1068T
													TOV-1533 GT
													TOV-1615 DT
													TOV-991 GT
													TOV-3492 DT
10	rs4462262;rs11005804	59,189,178-59,217,371	10q21.1	28,194 bp	3	ZWINT	-	-	IPMK*	1	1		TOV-916T	TOV-1284
													TOV-984 DT
10	rs7923690;rs7077284	67,306,869-67,318,448	10q21.3	11,580 bp	5	REEP3	-	-	CTNNA3	1	30	BOV-3150 DT	TOV-1694 DT	832T
												BOV-3150 GT	TOV-107 GT
												BOV-3268 DT	TOV-3492 DT
												BOV-3268 GT	TOV-2262 DT
												BOV-1207 DT
												1781T-A
												1781T-B
11	rs11036552;rs7112113	41,798,742-41,828,348	11p12	29,607 bp	3	LRRC4C	-	-	LOC399881	3	1	BOV-3097 DT	TOV-696 GT	TOV-1949T
												BOV-3097 GT	TOV-3423 GT
												BOV-3268 DT	TOV-3973 GT
												BOV-3268 GT	TOV-1915T
												BOV-2418 GT	TOV-4054 DT
												BOV-1207 DT	TOV-4054 GT
												BOV-1761 GT
11	rs12788406;rs7940219	49,715,689-49,769,264	11p11.12	53,576 bp	3	FOLH1	LOC440040	glutamate receptor, metabotropic 5 pseudogene	OR4C13	0	5		TOV-933 DT
11	rs2903854;rs7131188	55,360,213-55,460,095	11q11	99,883 bp	29/30	OR4C16	OR4C11	olfactory receptor, family 4, subfamily C, member 11	OR5D13	0	70	BOV-1172 DT	TOV-1267 DT
							OR4P4	olfactory receptor, family 4, subfamily P, member 4				BOV-1172 GT	TOV-107 GT
							OR4S2	olfactory receptor, family 4, subfamily S, member 2				BOV-3268 DT	TOV-3973 GT
							OR4C6	olfactory receptor, family 4, subfamily C, member 6				BOV-3268 GT	TOV-2262 DT
												BOV-2418 GT
11	rs10400291;rs4592448	86,304,054-86,307,016	11q14.2	2,963 bp	6	CCDC81	ME3	malic enzyme 3, NADP(+)-dependent, mitochondrial	PRSS23	0	0	BOV-2023 DT	TOV-107 GT
12	rs7956622;rs11052483	33,294,037-33,308,928	12p11.21-p11.1	14,892 bp	7	PKP2	-	-	SYT10	7	36	BOV-846 DT	TOV-916T	TOV-812EPT
												BOV-846 GT	TOV-1267 DT
													TOV-1615 DT
													TOV-2005 DT
													TOV-3703 GT
12	rs429295;rs1603225	70,871,858-70,882,727	12q15	10,870 bp	6	KCNMB4	-	-	PTPRB	3	0	BOV-3057 DT	TOV-1010 DT
												BOV-3057 GT	TOV-1010 GT
												BOV-2328 DT
12	rs7302869;rs11836555	108,412,100-108,458,650	12q23.3	46,551 bp	5/7	LOC278739	-	-	WSCD2	1	0			TOV-553EPT
13	rs7998352;rs1928393	34,134,809-34,149,388	13q13.2	14,580 bp	3	STARD13	-	-	RFC3	2	0	BOV-2314 DT
												BOV-2314 GT
13	rs1198316;rs1211304	50,370,205-50,381,016	13q14.2	10,812 bp	3	KPNA3	-	-	CTAGE10P	2	1			TOV-490
13	rs4884275;rs9563481	57,756,502-57,792,718	13q21.1	36,217 bp	6	PRR20B	-	-	PCDH17*	3	30		TOV-920 DT
													TOV-1615 DT
													TOV-920 GT
													TOV-3882 DT
13	rs9546330;rs2669264	83,787,475-83,793,975	13q31.1	6,501 bp	4	SPRY2	-	-	SLITRK1	3	1		TOV-1228 GT
13	rs7987913;rs9517112	98,527,866-98,536,863	13q32.2	8,998 bp	4	RAP2A	-	-	IPO5	5	0	BOV-392 DT
												BOV-392 GT
14	rs4502127;rs1778370	41,605,556-41,670,102	14q21.1	64,547 bp	7	FBXO33	-	-	LRFN5	2	37		TOV-1010 DT
													TOV-1010 GT
													N945T
14	cnvi0007263;rs1257687	98,573,881-98,578,988	14q32.2	5,108 bp	3	C14ORF177	-	-	BCL11B	0	0		TOV-206 DT
													TOV-107 GT
16	rs11639988;rs8046312	19,944,363-19,979,334	16p12.3	34,972 bp	6	GPRC5B	-	-	GPR139	1	15		TOV-1694 DT
													TOV-3165 GT
													TOV-2395 DT
17	rs8075188;rs917344	69,387,158-69,399,273	17q24.3	12,116 bp	3	KCNJ2	-	-	SOX9*	3	0			TOV-490
18	rs2377929;cnvi0008723			13,114 bp	3	KIAA0802	-	-	NDUFV2†	2	0			TOV-490
18	rs12606804;rs1852893	15,055,092-15,082,789	18p11.21	27,698 bp	3	ANKRD30B	-	-	LOC644669	1	1	BOV-3150 GT
18	rs2043680;rs1437032	38,257,382-38,274,650	18q12.3	17,269 bp	6	LOC647946	-	-	KC6	1	16	BOV-2506 DT	TOV-1607T
													TOV-4262 GT
18	rs644016;rs11662635	55,164,547-55,170,274	18q21.31	5,728 bp	3	ONECUT2	-	-	FECH	0	0		TOV-4262 GT
18	rs2715304;rs2715290	63,713,914-63,733,025	18q22.1	19,112 bp	3	CDH7	-	-	CHD19	0	1	BOV-392 DT	TOV-2395 DT
												BOV-392 GT	TOV-3922 GT
												BOV-2889 DT	N945TB02
												BOV-2889 GT	TOV-2173T
												BOV-3150 DT
												BOV-3150 GT
19	rs6511105;rs7254995	20,612,645-20,728,777	19p12	116,133 bp	15	ZNF826P	ZNF737	zinc finger protein 737	ZNF626	2	19	BOV-3150 DT
												BOV-3150 GT
19	rs12110;rs4805110	35,660,508-35,669,071	19q13.12	8,564 bp	3	FXYD7	FXYD5	FXYD domain containing ion transport regulator 5	FAM187B	3	0		TOV-696 GT
20	rs6057245;rs3969184	29,429,945-29,505,017	20q11.21	75,073 bp	5/6	Centromere	-	-	FRG1B	1	0	BOV-3150 GT
21	rs197581;rs2824577	19,321,203-19,332,129	21q21.1	10,927 bp	3	NCRNA00157	-	-	CHODL	1	4	BOV-2418 GT	TOV-1615 DT	TOV-812EPT
												BOV-2023 DT	TOV-4105G_A_T
												BOV-1207 DT
22	rs5748755;rs4819923	17,426,401-17,433,210	22q11.1	6,810 bp	3	HSFY1P1	-	-	GAB4	1	0			TOV-490
22	rs4820539;rs2283804	23,477,970-23,490,335	22q11.22	12,366 bp	3	GNAZ	RTDR1	rhabdoid tumor deletion region gene 1	PCR	3	0		TOV-2173T	TOV-854 DT
							RAB36*	RAB36, member RAS oncogene family						TOV-854 GT
X	rs5963931;rs5918139	41,064,184-41,116,530	Xp11.4	52,347 bp	3	MED14	USP9X	ubiquitin specific peptidase 9, X-linked	DDX3X	0	2			TOV-490
X	rs5950193;rs5990273	94,381,450-94,397,680	Xq21.33	16,231 bp	3	FAM133A	-	-	DIAPH2	0	1			TOV-490
*Deletions are mapped on the Human Feb. 2009 (GRCh37/hg19) assembly of the human genome, except for the deletions flanked by non-SNP markers, which are mapped to the Human March 2006 (NCBI36/hg18) assembly. Flanking SNPs refers to the SNP markers flanking the homozygously deleted SNPs, and represent the largest possible size of the deletion. The genes located within and directly upstream and down…

## Sheet: Sheet3
Size (bp)
14,559 bp
143,039 bp
56,740 bp
25,328 bp
14,543 bp
7,130 bp
47,534 bp
9,690 bp
5,476 bp
37,032 bp
9,976 bp
18,849 bp
11,759 bp
13,805 bp
69,627 bp
5,302 bp
49,592 bp
8,965 bp
11,224 bp
115,447 bp
9,400 bp
8,701 bp
8,859 bp
12,550 bp
17,948 bp
11,649 bp
51,507 bp
21,406 bp
48,185 bp
132,415 bp
104,491 bp
15,835 bp
15,184 bp
11,188 bp
12,375 bp
12,546 bp
10,992 bp
14,157 bp
2,011 bp
19,165 bp
22,883 bp
14,346 bp.
30,186 bp
36,609 bp
11,920 bp
59,873 bp
4,256 bp
11,297 bp
8,934 bp
33,303 bp
4,823 bp
6,866 bp
8,112 bp
76,109 bp
15,921 bp
237,620 bp
13,131 bp
4,820 bp
4,662 bp
7,334 bp
8,387 bp
15,248 bp
11,140 bp
30,925 bp
21,286 bp
7,023 bp.
9,696 bp
9,909 bp
13,814 bp
158,586 bp
10,652 bp
4,893 bp
24,308 bp
18,603 bp
9,525 bp
121,258 bp
15,871 bp
8,874 bp
3,450 bp
4,226 bp
24,928 bp
8,443 bp
7,984 bp
21,215 bp
11,399 bp
28,194 bp
11,580 bp
29,607 bp
53,576 bp
99,883 bp
2,963 bp
14,892 bp
10,870 bp
46,551 bp
14,580 bp
10,812 bp
36,217 bp
6,501 bp
8,998 bp
64,547 bp
5,108 bp
34,972 bp
12,116 bp
13,114 bp
27,698 bp
17,269 bp
5,728 bp
19,112 bp
116,133 bp
8,564 bp
75,073 bp
10,927 bp
6,810 bp
12,366 bp
52,347 bp
16,231 bp
