# Supplementary material for: Chromosome 3 Anomalies Investigated by Genome Wide SNP Analysis of Benign, Low Malignant Potential and Low Grade Ovarian Serous Tumours
Source: PLoS One. 2011 Dec 6;6(12):e28250. doi: 10.1371/journal.pone.0028250 (PMC3232202; doi:10.1371/journal.pone.0028250)
Supplement: Table S3 — Novel primers used in the present study. (XLS) [file pone.0028250.s003.xls]

## Sheet: Sheet1
Supplementary Table 3: Novel primers used in the present study
Primers for genomic sequencing
Primer Name	Primer Sequence
TP53exon3-Reverse	AGAGCAGTCAGAGGACCAG
TP53exon4-Forward	CTGGTAAGGACAAGGGTTG
TP53exon5-Forward	GGTGTAGACGCCAACTCTC
TP53exon7-Forward	ACTGAAGCTTACAGAGGCTAAG
TP53exon7-Reverse	AGTGGGAGCAGTAAGGAGAT
KRASexon2-Forward	TTCATTACGATACACGTCTGC
KRASexon2-Reverse	TGAAACCCAAGGTACATTTC
BRAFexon15-Forward	TGACTCTAAGAGGAAAGATGAAGT
BRAFexon15-Reverse	GATTTTTGTGAATACTGGGAAC
Primers for RT-PCR analysis of GOPC-ROS1 fusion gene
Primer Name	Primer Sequence
GOPC-Forward	GGGACACAAAGCATAAAGAAGC
ROS1-Reverse	CAGCTCAGCCAACTCTTTGTC
